# Supplementary material
Source: PubMed Central journal article supplement (PMC7895511)
Supplement: 216_2021_3233_MOESM1_ESM.pdf [file 216_2021_3233_MOESM1_ESM.pdf]

## Supplementary Information

### Screening and evaluation of anti-SARS-CoV-2 components from *Ephedra sinica* by ACE2/CMC-HPLC-IT-TOF-MS approach

Yanni Lv<sup>1,2</sup>, Saisai Wang<sup>1,2</sup>, Peida Liang<sup>1,2</sup>, Yamin Wang<sup>1,2</sup>, Xin Zhang<sup>1,2</sup>, Qianqian Jia<sup>1,2</sup>,  
Jia Fu<sup>1,2</sup>, Shengli Han<sup>1,2\*</sup>, Langchong He<sup>1,2</sup>

<sup>1</sup> School of Pharmacy, Xi'an Jiaotong University, Xi'an, Shaanxi 710061, China

<sup>2</sup> Institute of Pharmaceutical Science and Technology, Western China Science & Technology Innovation

Harbour, Xi'an, Shaanxi 710115, China

Author Information

**\*Corresponding author:**

Dr. Shengli Han, School of Pharmacy, Xi'an Jiaotong University, 76# Yanta Westroad, Xi'an  
710061, China.

**Email:** slhan2008@mail.xjtu.edu.cn

## **Methods**

### **Preparation of ACE2/CMC column**

The ACE2/CMC column was prepared by the method in our previous study. Briefly, the ACE2<sup>h</sup> cell line ( $1 \times 10^7$  cells) being in exponential phase were collected and washed three times with physiological saline (pH 7.4) by centrifugation at 1000 g, 4 °C for 5 min, and then ruptured with Tris-HCl (pH 7.4, 50 mmol/L) by an ultrasonic procedure for 30 min in an ice-bath. After that, the suspension was separated by centrifugation at 1000 g, 4 °C for 10 min. Only the supernatant was collected and subsequently centrifuged at 12,000 g, 4 °C for 20 minutes to obtain the precipitation which was then washed twice with physiological saline. Ultimately, the ACE2 cell membrane saline suspension (5 mL) was slowly added to silica (50 mg, activated at 105 °C for 30 min) under vacuum condition with continuous vortex in an ice-bath, followed by stirring with a magnetic stirrer and standing overnight at 4 °C to produce the ACE2 cell membrane stationary phase which was finally packed into a standard CMC column (10 mm × 2.0 mm I.D.) on a column-loading machine according to a wet packing method.

**Fig. S1**

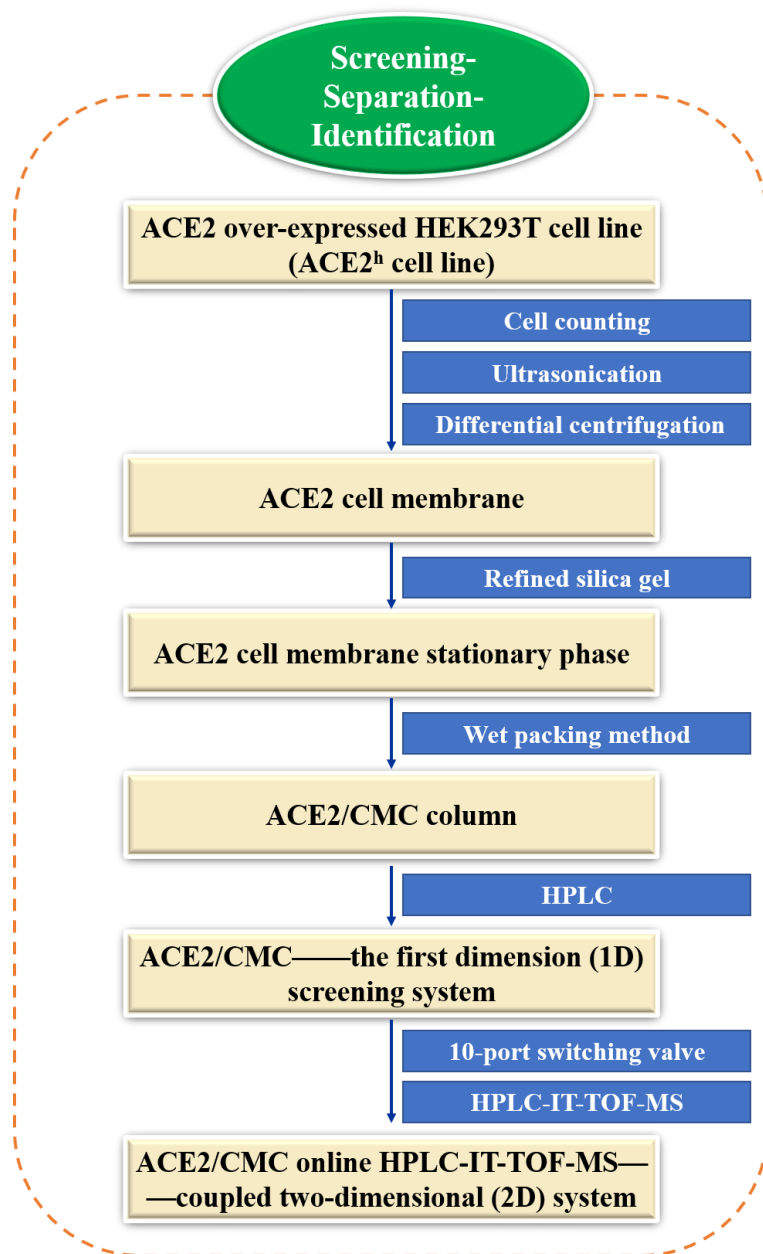

**Fig. S1** Diagram of ACE2/CMC bioaffinity chromatography model and ACE2-HPLC-IT-TOF-MS system

**Fig. S2**

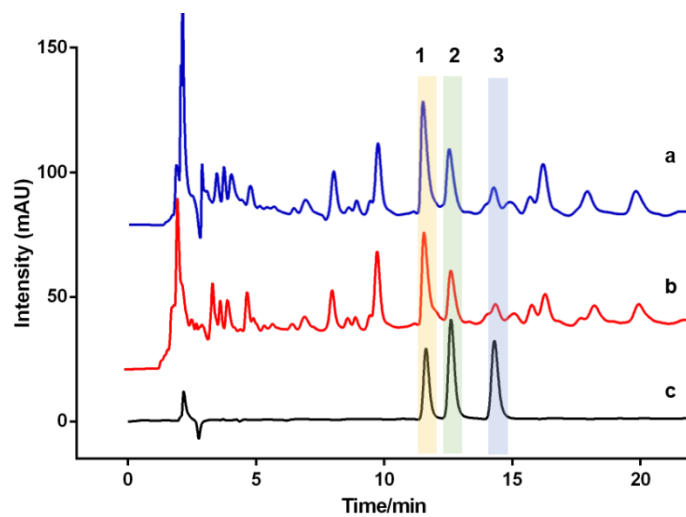

**Fig. S2** High-performance liquid chromatography (HPLC) chromatograms (both at 254 nm) of methanol extract (a) and aqueous phosphate extract (b) of *Ephedra sinica*, and its active compounds (c). 1, EP; 2, PEP; 3, MEP
